# Supplementary material
Source: Research Square preprint supplement (doi:10.21203/rs.3.rs-9616093/v1)
Supplement: Supplementary file 1 [file 47964cd075fd9377c0d3688e.docx]

**Table S1** Factors and levels of Box-Behnken experiment design

| Factor | Levels | | |
| --- | --- | --- | --- |
| -1 | 0 | 1 |
| A: pH | 6 | 7 | 8 |
| B: protein concentration（%） | 10 | 15 | 20 |
| C: protein-to-carbohydrate ratio | 9 | 10 | 11 |
| D: temperature | 60 | 70 | 80 |
