# Supplementary material
Source: Research Square preprint supplement (doi:10.21203/rs.3.rs-9616093/v1)
Supplement: Supplementary file 2 [file 50af87c8e6ce456dedd6b380.docx]

| Source | Sum of squares | DF | Variance | *F* value | *P* value | Significant |
| --- | --- | --- | --- | --- | --- | --- |
| Model | 473.71 | 14 | 33.84 | 92.48 | < 0.0001 | *** |
| A | 3.00 | 1 | 3.00 | 8.20 | 0.0125 | * |
| B | 9.90 | 1 | 9.90 | 27.06 | 0.0001 | *** |
| C | 15.87 | 1 | 15.87 | 43.37 | < 0.0001 | *** |
| D | 0.9075 | 1 | 0.9075 | 2.48 | 0.1376 |  |
| AB | 0.0000 | 1 | 0.0000 | 0.0000 | 1.0000 | - |
| AC | 0.2500 | 1 | 0.2500 | 0.6833 | 0.4223 | - |
| AD | 0.2500 | 1 | 0.2500 | 0.6833 | 0.4223 | - |
| BC | 0.2500 | 1 | 0.2500 | 0.6833 | 0.4223 | - |
| BD | 0.9025 | 1 | 0.9025 | 2.47 | 0.1386 | - |
| CD | 1.69 | 1 | 1.69 | 4.62 | 0.0496 | * |
| A2 | 192.37 | 1 | 192.37 | 525.76 | < 0.0001 | *** |
| B2 | 202.21 | 1 | 202.21 | 552.64 | < 0.0001 | *** |
| C2 | 112.84 | 1 | 112.84 | 308.39 | < 0.0001 | *** |
| D2 | 175.96 | 1 | 175.96 | 480.90 | < 0.0001 | *** |
| Residual | 5.12 | 14 | 0.4321 |  |  |  |
| Lack of Fit | 2.08 | 10 | 0.2082 | 0.2740 | 0.9559 |  |
| Error | 3.04 | 4 | 0.7600 |  |  |  |
| Cor Total | 478.83 | 28 |  |  |  |  |
| *R2* | 0.9893 |  |  |  |  |  |
| *R2adj* | 0.9786 |  |  |  |  |  |
| C.V.% | 1.88 |  |  |  |  |  |

**Table S3** Analysis of variance and significance test of regression model

Note: *** indicates highly significant (*P* < 0.01); ** indicates significant (*P* < 0.05); - indicates not significant (*P* ＞ 0.05).
