# Supplementary material
Source: Research Square preprint supplement (doi:10.21203/rs.3.rs-9616093/v1)
Supplement: Supplementary file 3 [file ac7fa27594a28b7e91370544.docx]

**Table S2** The Box-Behnken experimental design and results

| Protein concentration | A-pH | B-Protein concentration（%） | C-SIP:COS ratio | D-temperature（℃） | grafting degree（%） |
| --- | --- | --- | --- | --- | --- |
| 1 | 6 | 10 | 1:3 | 70 | 28 |
| 2 | 8 | 10 | 1:3 | 70 | 29 |
| 3 | 6 | 20 | 1:3 | 70 | 30 |
| 4 | 8 | 20 | 1:3 | 70 | 31 |
| 5 | 7 | 15 | 1:2 | 60 | 29.5 |
| 6 | 7 | 15 | 1:4 | 60 | 32.9 |
| 7 | 7 | 15 | 1:2 | 80 | 30.7 |
| 8 | 7 | 15 | 1:4 | 80 | 31.5 |
| 9 | 6 | 15 | 1:3 | 60 | 29 |
| 10 | 8 | 15 | 1:3 | 60 | 30 |
| 11 | 6 | 15 | 1:3 | 80 | 29.6 |
| 12 | 8 | 15 | 1:3 | 80 | 31.6 |
| 13 | 7 | 10 | 1:2 | 70 | 28.5 |
| 14 | 7 | 20 | 1:2 | 70 | 30.5 |
| 15 | 7 | 10 | 1:4 | 70 | 31.9 |
| 16 | 7 | 20 | 1:4 | 70 | 32.9 |
| 17 | 6 | 15 | 1:2 | 70 | 29.5 |
| 18 | 8 | 15 | 1:2 | 70 | 30.5 |
| 19 | 6 | 15 | 1:4 | 70 | 31.9 |
| 20 | 8 | 15 | 1:4 | 70 | 31.9 |
| 21 | 7 | 10 | 1:3 | 60 | 28 |
| 22 | 7 | 20 | 1:3 | 60 | 30.9 |
| 23 | 7 | 10 | 1:3 | 80 | 29.6 |
| 24 | 7 | 20 | 1:3 | 80 | 30.6 |
| 25 | 7 | 15 | 1:3 | 70 | 40.1 |
| 26 | 7 | 15 | 1:3 | 70 | 39.9 |
| 27 | 7 | 15 | 1:3 | 70 | 40.0 |
| 28 | 7 | 15 | 1:3 | 70 | 41.1 |
| 29 | 7 | 15 | 1:3 | 70 | 41.9 |
